# Supplementary material for: Ni nanoparticles embedded in nitrogen doped carbon derived from metal–organic frameworks for the efficient hydrogenation of vanillin to vanillyl alcohol
Source: Royal Society of Chemistry journal article supplement (doi:10.1039/d2nj01110g), 2022-01-01
Supplement: d2nj01110g1.pdf [file d2nj01110g1.pdf]

Electronic Supplementary Material (ESI) for New Journal of Chemistry.

This journal is © The Royal Society of Chemistry and the Centre National de la Recherche Scientifique  
2022

## Supplementary Information

### **Ni nanoparticles embedded in nitrogen doped carbon derived from metal-organic framework for efficient hydrogenation of vanillin to vanillyl alcohol**

Zegang Qiu<sup>a</sup>, Xiaoxia He<sup>a</sup>, Shaobo Ma<sup>a</sup>, Zhiqin Li<sup>a\*</sup>, Yu Xiong<sup>b</sup> and Yueling Cao<sup>b,c\*</sup>

<sup>a</sup> College of Chemistry and Chemical Engineering, Xi'an Shiyu University, Xi'an 710065, PR China.

<sup>b</sup> Xi'an Key Laboratory of Functional Organic Porous Materials, School of Chemistry and Chemical Engineering, Northwestern Polytechnical University, Xi'an 710129, PR China.

<sup>c</sup> Chongqing Science and Technology Innovation Center of Northwestern Polytechnical University, Chongqing 401135, PR China

\*e-mail: lizhiqin@xsyu.edu.cn; yuelingcao@nwpu.edu.cn

**Table S1** Hydrogenation of vanillin to vanillyl alcohol over various catalysts in literatures and this work

| Catalysts              | Reaction conditions |       |     |                              | Vanillin conversion/% | Vanillyl alcohol Selectivity/% | Reference | Date |
|------------------------|---------------------|-------|-----|------------------------------|-----------------------|--------------------------------|-----------|------|
|                        | T/°C                | p/MPa | t/h | Solvent                      |                       |                                |           |      |
| Ru/CNTs                | 50                  | 1     | 3   | Decalin/<br>H <sub>2</sub> O | 100                   | 98.0                           | [12]      | 2014 |
| Ru/C                   | 55                  | 1.38  | 1   | H <sub>2</sub> O             | 95                    | 91.0                           | [13]      | 2014 |
| Rh/C                   | 100                 | 3     | 3   | H <sub>2</sub> O             | 99                    | 83.0                           | [14]      | 2018 |
| Pt/C                   | 100                 | 3     | 3   | H <sub>2</sub> O             | 100                   | 70.0                           | [14]      | 2018 |
| Pt/TiO <sub>2</sub>    | 70                  | 2     | 2   | H <sub>2</sub> O             | 58.1                  | 97.9                           | [15]      | 2020 |
| Pt/C                   | 100                 | 2.9   | 3   | H <sub>2</sub> O             | 100                   | 63.0                           | [16]      | 2018 |
| <sup>a</sup> Pd/CM     | 100                 | 1     | 1   | H <sub>2</sub> O             | 95                    | 80.0                           | [17]      | 2014 |
| Pd/Ru@GO               | room                | 1     | 12  | methanol                     | 100                   | 100                            | [18]      | 2020 |
| Ir/ZrO <sub>2</sub>    | 100                 | 3     | 4   | H <sub>2</sub> O             | 100                   | 77.0                           | [19]      | 2019 |
| Ni/ZrO <sub>2</sub>    | 100                 | 3     | 4   | H <sub>2</sub> O             | 95                    | 86.0                           | [19]      | 2019 |
| Ni/AC                  | 150                 | 0.5   | 2   | H <sub>2</sub> O             | 35.9                  | 75.2                           | [20]      | 2017 |
| Co/N-C                 | 150                 | 1     | 4   | H <sub>2</sub> O             | 77.9                  | 61.8                           | [21]      | 2017 |
| <sup>b</sup> Ni@CN-425 | 80                  | 1     | 2   | H <sub>2</sub> O             | 99.5                  | 98.3                           | This work |      |

<sup>a</sup>CM: Carbonaceous Microspheres. <sup>b</sup> Ni@CN-425 catalyst in this work is presented for comparison.

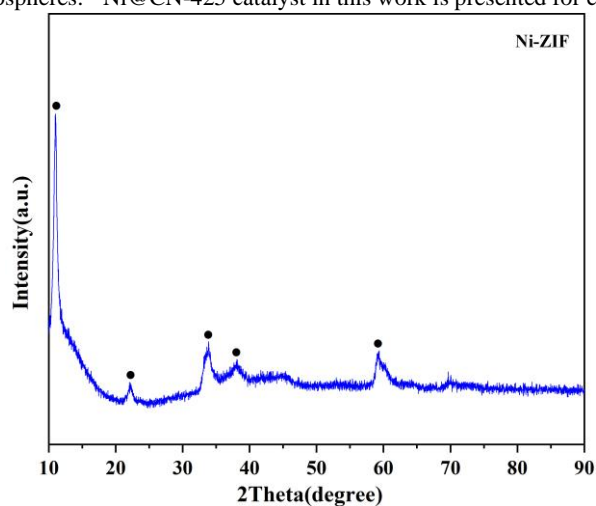**Fig. S1** XRD patterns of Ni-ZIF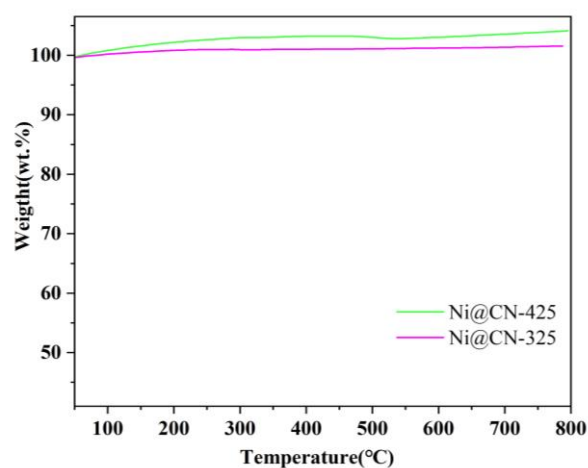**Fig. S2** TGA curves of Ni@CN-325, Ni@CN-425 and Ni@CN-525

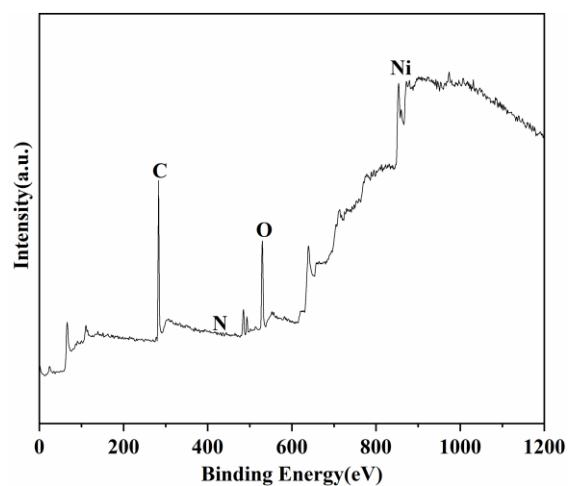

**Fig. S3** XPS survey spectrum of Ni@CN-425

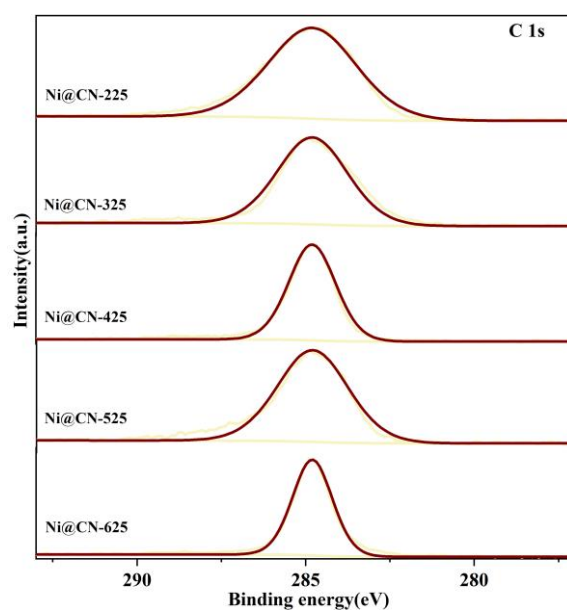

**Fig. S4** High resolution XPS spectra of C 1s of serial Ni@CN catalysts

**Table S2** The content of surface elements of Ni@CN catalysts obtained from XPS

| Catalysts | Ni/% | C/%  | N/% | O/%  |
|-----------|------|------|-----|------|
| Ni@CN-225 | 12.1 | 42.4 | 3.8 | 41.7 |
| Ni@CN-325 | 10.5 | 63.3 | 2.7 | 23.5 |
| Ni@CN-425 | 7.5  | 70.0 | 2.6 | 19.9 |
| Ni@CN-525 | 6.0  | 78.5 | 2.5 | 13.0 |
| Ni@CN-625 | 5.3  | 80.2 | 2.2 | 12.3 |

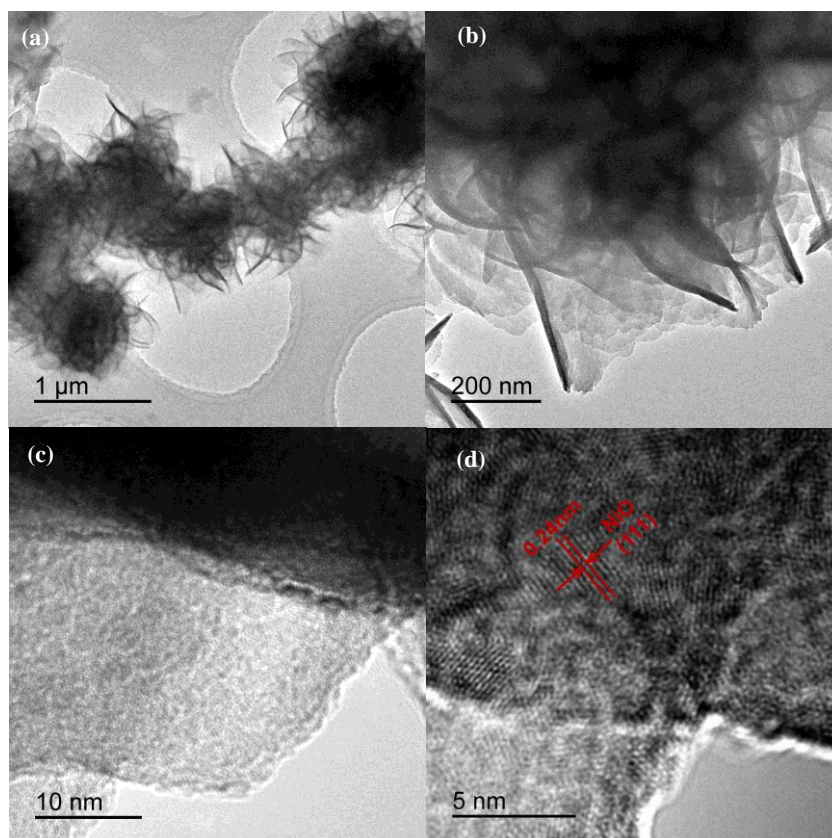

**Fig. S5** TEM images of Ni@CN-225 catalyst with different magnification

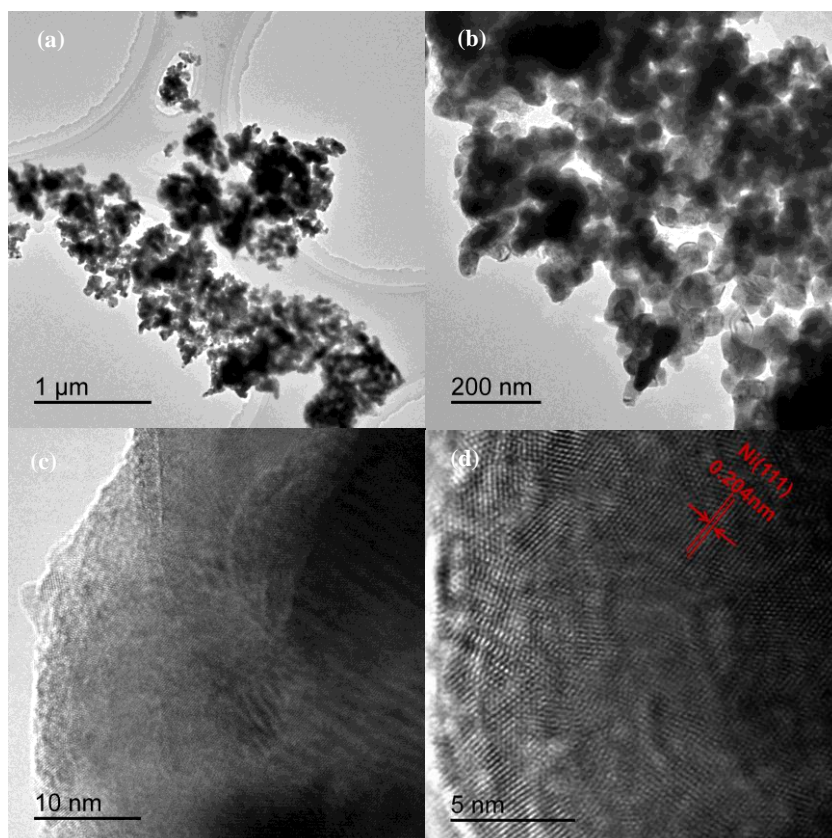

**Fig. S6** TEM images of Ni@CN-325 catalyst with different magnification

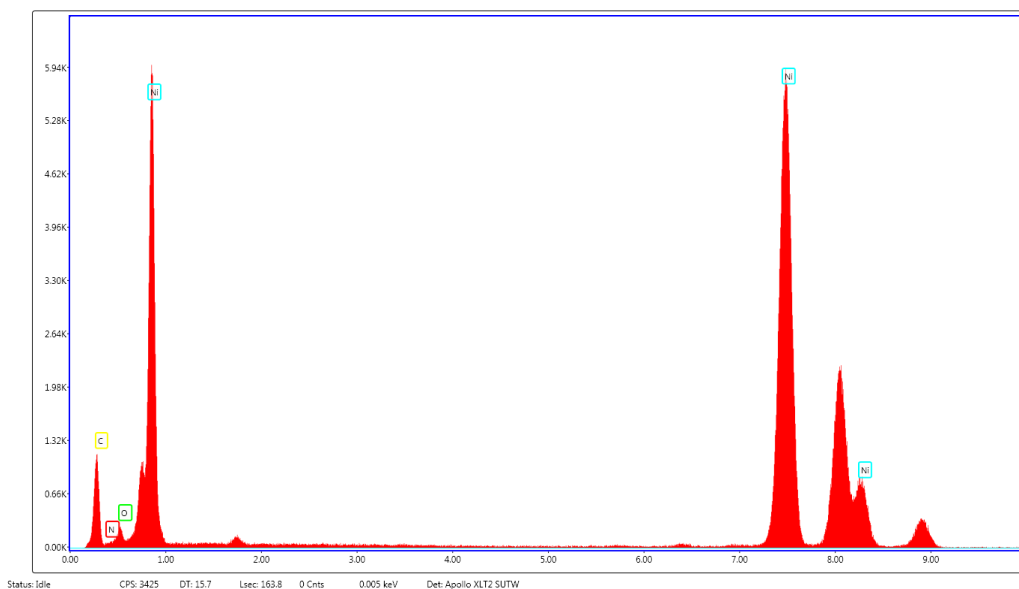

**Fig. S7** EDS spectra of Ni@CN-425 catalyst (phase: NiK)

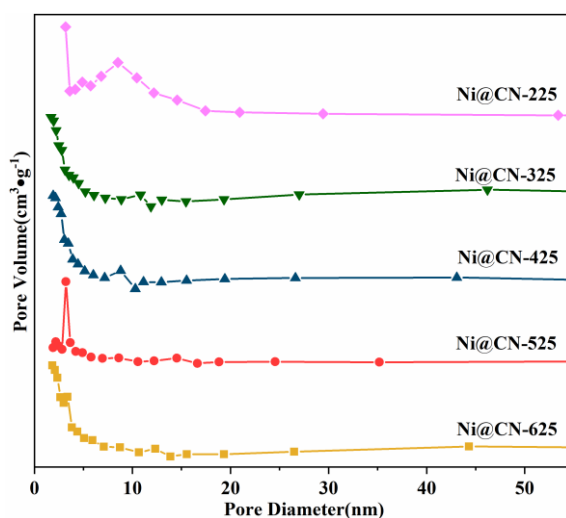

**Fig. S8** The BJH (Barrett-Joyner-Halenda) pore distribution curves of Ni@CN catalysts

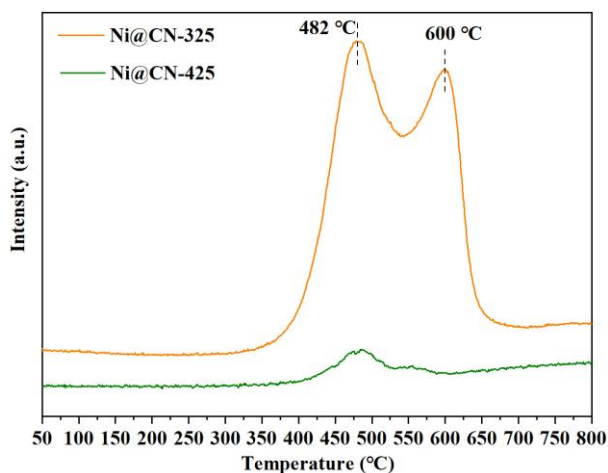

**Fig. S9** H<sub>2</sub>-TPD profiles of the of Ni@CN-325 and Ni@CN-425

The temperature-programmed desorption of H<sub>2</sub> (H<sub>2</sub>-TPD) was measured on AutoChem II 2920 (Micromeritics, USA). About 70 mg catalyst was first pretreated at 300 °C for 1.5 h in an argon flow (50 mL/min) before it was cooled to 50 °C. Then the argon was switched to a 10% H<sub>2</sub>/Ar flow (50 mL/min) and kept for 3 h. Subsequently, the H<sub>2</sub>/Ar flow was switched to helium flow 50 mL/min) and kept for 1 h in order to eliminate the physically adsorbed H<sub>2</sub>. Finally, the temperature was ramped from 50 °C to 800 °C at a rate of 10 °C/min in the helium flow.
